# Supplementary material for: Prioritizing smallholder animal health needs in East Africa, West Africa, and South Asia using three approaches: Literature review, expert workshops, and practitioner surveys
Source: PubMed Central journal article supplement (PMC8024747; doi:10.1016/j.prevetmed.2021.105279), 2021-04
Supplement: mmc7.pdf [file mmc7.pdf]

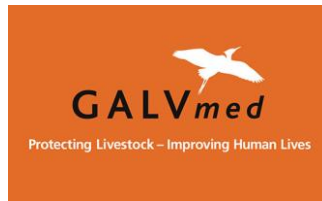

## Meta-analysis results

### *Geographic location*

East Africa had a larger body of literature for smallholder animal health needs than West Africa (315 articles and 101 articles, respectively), even when literature in French was included. Cattle were discussed in almost two-thirds of the articles (307/423), small ruminants in about a third (134/423), and poultry in about a tenth (53/423). Only four articles addressed animal health needs in all three livestock categories. The number of articles considered in the meta-analysis by geographic location and livestock type is shown in Table 1. Note that many articles mention multiple livestock types.

|                 | East Africa | West Africa | All      |
|-----------------|-------------|-------------|----------|
| Cattle          | 240 (67)    | 67 (25)     | 307 (92) |
| Small ruminants | 100 (35)    | 34 (14)     | 134 (49) |
| Poultry         | 29 (12)     | 24 (10)     | 53 (22)  |

**Table 1:** Number of articles considered in the meta-analysis by addressed geographic location and livestock type. In parentheses is the number of articles focusing on impact that are summarized more fully.

### *Animal health concerns*

Across East and West Africa and all livestock types, the animal health concerns that appeared most frequently (in 20 or more articles) were ectoparasites, brucellosis, foot-and-mouth disease (FMD), African Animal trypanosomiosis (AAT), endoparasites, tick-borne-disease, helminths, Peste des Petits Ruminants (PPR), mange, Newcastle disease (ND), and tuberculosis (TB) (See Table 2). The most frequent health concerns in East Africa (mentioned in 20 or more articles) are all represented on this list. The most frequent animal health concerns in West Africa (mentioned in 10 or more articles) are also all represented with the addition of avian influenza. Tuberculosis, while appearing frequently in the East Africa literature, is mentioned by only two articles in the West Africa literature. The full list of all animal health concerns for all livestock types is presented as [Appendix 1](#).



| Overall                |    | East Africa            |    | West Africa            |    |
|------------------------|----|------------------------|----|------------------------|----|
| Ectoparasites          | 49 | Ectoparasites          | 34 | Brucellosis            | 14 |
| Brucellosis            | 47 | Brucellosis            | 32 | Ectoparasites          | 13 |
| Foot and mouth disease | 45 | Foot and mouth disease | 32 | Foot and mouth disease | 13 |
| Trypanosomiasis        | 36 | Trypanosomiasis        | 27 | Newcastle disease      | 11 |
| Endoparasites          | 33 | Tick-borne disease     | 26 | Helminths              | 10 |
| Tick-borne disease     | 31 | Endoparasites          | 24 | PPR                    | 10 |
| Helminths              | 31 | Tuberculosis           | 22 | Avian influenza        | 10 |
| PPR                    | 29 | Helminths              | 20 |                        |    |
| Mange                  | 27 | PPR                    | 20 |                        |    |
| Newcastle disease      | 27 |                        |    |                        |    |
| Tuberculosis           | 24 |                        |    |                        |    |

**Table 2: Animal health concerns by frequency of mention in literature review.** The numbers correspond to the number of articles mentioning the respective animal health concern. (n=423)

### *Impact articles*

The comparison of the broad meta-analysis with the meta-analysis of impact articles only shows a good deal of overlap but some key differences. Ectoparasites, brucellosis, and Newcastle disease top both lists. Foot and mouth disease drops in ranking in the meta-analysis of impact articles. African Animal Trypanosomiasis, while not high ranking in the overall literature review, is present in the impact article meta-analysis for both East and West Africa. Lumpy skin disease in East Africa was not in the most frequently mentioned meta-analysis concerns, but had the distinction of two green-ranking papers quantifying its economic impact for smallholders. Lastly, though avian influenza (AI) tops the impact article meta-analysis, the content of the articles suggest that while the cost of an avian influenza outbreak is high, it is not a top concern for farmers because it is rare. The high frequency of avian influenza articles is likely a response to outbreaks in West Africa. Many articles focusing on other poultry health concerns took advantage of the surveillance conducted as a response to AI outbreaks.



| Overall            |    | East Africa        |    | West Africa       |   |
|--------------------|----|--------------------|----|-------------------|---|
| Ectoparasites      | 15 | Newcastle disease  | 10 | Avian influenza   | 5 |
| Brucellosis        | 15 | Ectoparasites      | 9  | Newcastle disease | 4 |
| Newcastle disease  | 14 | PPR                | 9  | Ectoparasites     | 3 |
| Endoparasites      | 13 | Brucellosis        | 7  | Brucellosis       | 3 |
| PPR                | 12 | Endoparasites      | 7  | FMD               | 3 |
| FMD                | 11 | Tick-borne disease | 6  | AAT               | 3 |
| Helminths          | 11 | FMD                | 5  | Helminths         | 3 |
| AAT                | 10 | AAT                | 5  | PPR               | 3 |
| Tick-borne disease | 9  | Helminths          | 5  |                   |   |
| RVF                | 9  | TB                 | 5  |                   |   |
|                    |    | RVF                | 5  |                   |   |
|                    |    | Anaplasmosis       | 5  |                   |   |
|                    |    | Lumpy skin disease | 5  |                   |   |

**Table 3: Animal health concerns by frequency of mention in subset of impact articles.** The numbers correspond to the number of articles mentioning the respective animal health concern. (n=163)

#### Appendix 1

#### Summary of animal health concerns for all livestock types

| Animal health concern | Frequency of mention | Frequency of mention | Frequency of mention |
|-----------------------|----------------------|----------------------|----------------------|
|                       | Overall              | East Africa          | West Africa          |
| Ectoparasites         | 49                   | 34                   | 13                   |
| Brucellosis           | 47                   | 32                   | 14                   |
| FMD                   | 45                   | 32                   | 13                   |
| AAT                   | 36                   | 27                   | 9                    |
| Endoparasites         | 33                   | 24                   | 9                    |
| Tick-borne disease    | 31                   | 26                   | 5                    |
| Helminth              | 31                   | 20                   | 10                   |
| PPR                   | 29                   | 20                   | 10                   |
| Mange                 | 27                   | 19                   | 6                    |
| Newcastle disease     | 27                   | 16                   | 11                   |
| TB                    | 24                   | 22                   | 2                    |
| RVF                   | 19                   | 15                   | 4                    |

|                             |    |    |    |
|-----------------------------|----|----|----|
| Mastitis                    | 19 | 17 | 2  |
| Lumpy skin disease          | 19 | 19 | 0  |
| Abortion                    | 18 | 13 | 5  |
| Anaplasmosis                | 17 | 15 | 2  |
| CBPP                        | 16 | 8  | 8  |
| East Coast fever            | 15 | 15 | 1  |
| IBD                         | 14 | 10 | 4  |
| Pasteurellosis              | 14 | 12 | 2  |
| Avian influenza             | 12 | 2  | 10 |
| CCPP                        | 11 | 10 | 1  |
| Blackquarter                | 11 | 10 | 1  |
| Heartwater                  | 11 | 6  | 5  |
| Anthrax                     | 10 | 9  | 1  |
| Theileriosis                | 10 | 9  | 1  |
| Diarrhea                    | 9  | 6  | 3  |
| Fascioliasis                | 9  | 4  | 3  |
| Babesiosis                  | 9  | 6  | 3  |
| Q fever                     | 8  | 5  | 3  |
| Dermatophilosis             | 7  | 5  | 2  |
| Goat pox                    | 7  | 6  | 1  |
| Fowl Pox                    | 7  | 4  | 3  |
| Chronic respiratory disease | 6  | 3  | 3  |
| Leptospirosis               | 5  | 5  | 0  |
| Bovine viral diarrhea virus | 5  | 5  | 0  |
| Coccidiosis                 | 5  | 4  | 1  |
| Hydatidosis                 | 5  | 4  | 1  |
| Schistosomiasis             | 5  | 3  | 2  |
| Sheep pox                   | 5  | 5  | 0  |
| Malignant catarrhal fever   | 5  | 5  | 0  |
| Marek's disease             | 4  | 4  | 0  |
| Cryptosporidiosis           | 4  | 4  | 0  |
| Toxoplasmosis               | 4  | 4  | 0  |
| Fowl cholera                | 4  | 2  | 2  |
| Acaricide resistance        | 3  | 3  | 0  |
| Aflatoxin                   | 3  | 3  | 0  |
| Bluetongue                  | 3  | 3  | 0  |
| Colibacillosis              | 3  | 3  | 0  |
| Haemonchosis                | 3  | 2  | 1  |
| Infectious bronchitis       | 3  | 1  | 2  |



|                                      |   |   |   |
|--------------------------------------|---|---|---|
| Orf                                  | 3 | 3 | 0 |
| Fowl typhoid                         | 3 | 2 | 1 |
| Salmonellosis                        | 3 | 3 | 0 |
| Bloat                                | 2 | 1 | 1 |
| Colisepticemia                       | 2 | 1 | 1 |
| Copper deficiency                    | 2 | 2 | 0 |
| Cystic echinococcosis                | 2 | 2 | 0 |
| Cysticercosis                        | 2 | 1 | 1 |
| Dystocia                             | 2 | 2 | 0 |
| Mycoplasmosis                        | 2 | 2 | 0 |
| <i>Neospora caninum</i><br>infection | 2 | 2 | 0 |
| Reproductive disorder                | 2 | 2 | 0 |
| Retention fetal<br>membrane          | 2 | 2 | 0 |
| Tetanus                              | 2 | 1 | 1 |
| Trypanocide resistance               | 2 | 2 | 0 |

Animal health concerns listed in only one article are listed below.

Actinomycosis  
 Acute haemorrhagic syndrome  
 Arbovirus  
 Arthritis  
 Bartonellosis  
 Besnoitiosis  
 Biting fly  
 Bovine herpesvirus  
 Bovine immunodeficiency virus  
 Bovine spongiform encephalopathy  
 Campylobacteriosis  
 Chicken anemia virus  
 Delayed heat period  
 Dermatophytosis  
 Enzootic bovine leucosis  
 Eye infections  
 Foetal wastage  
 Foot conditions  
 Giardia  
 Haemorrhagic septicaemia  
 Hemoparasite



Histophilosis  
Infectious coryza  
Johne's disease  
Lameness  
Parasitic gastroenteritis  
Prolapsed uterus  
Rinderpest  
Schmallenberg virus  
Skin problems  
Tungiasis  
Vaginal and uterine prolepses  
Paramphistomiasis
